# Supplementary material
Source: PubMed Central journal article supplement (PMC3106419)

Supporting Information for:

**Enhanced Potency of Nucleotide-Dendrimer Conjugates as Agonists of the P2Y<sub>14</sub> Receptor: Multivalent Effect in G Protein-Coupled Receptor Recognition**

Arijit Das,<sup>a</sup> Yixing Zhou,<sup>b</sup> Rhonda Carter,<sup>b</sup> T. Kendall Harden,<sup>b</sup> and Kenneth A. Jacobson<sup>a\*</sup>

Table of Contents

|                                                                |       |
|----------------------------------------------------------------|-------|
| Figure S1. <sup>1</sup> H NMR spectrum of compound <b>9</b> .  | p. S2 |
| Figure S2. <sup>1</sup> H NMR spectrum of compound <b>12</b> . | p. S3 |
| Figure S3. MALDI MS of PAMAM dendrimer complex <b>8</b> .      | p. S4 |
| Figure S4. MALDI MS of PAMAM dendrimer complex <b>9</b> .      | p. S5 |
| Figure S5. MALDI MS of PAMAM dendrimer complex <b>10</b> .     | p. S6 |
| Figure S6. MALDI MS of PAMAM dendrimer complex <b>11</b> .     | p. S7 |
| Figure S7. MALDI MS of PAMAM dendrimer complex <b>15</b> .     | p. S8 |

Figure S1.  $^1\text{H}$  NMR spectrum of PAMAM-UDPGA conjugate **9**.

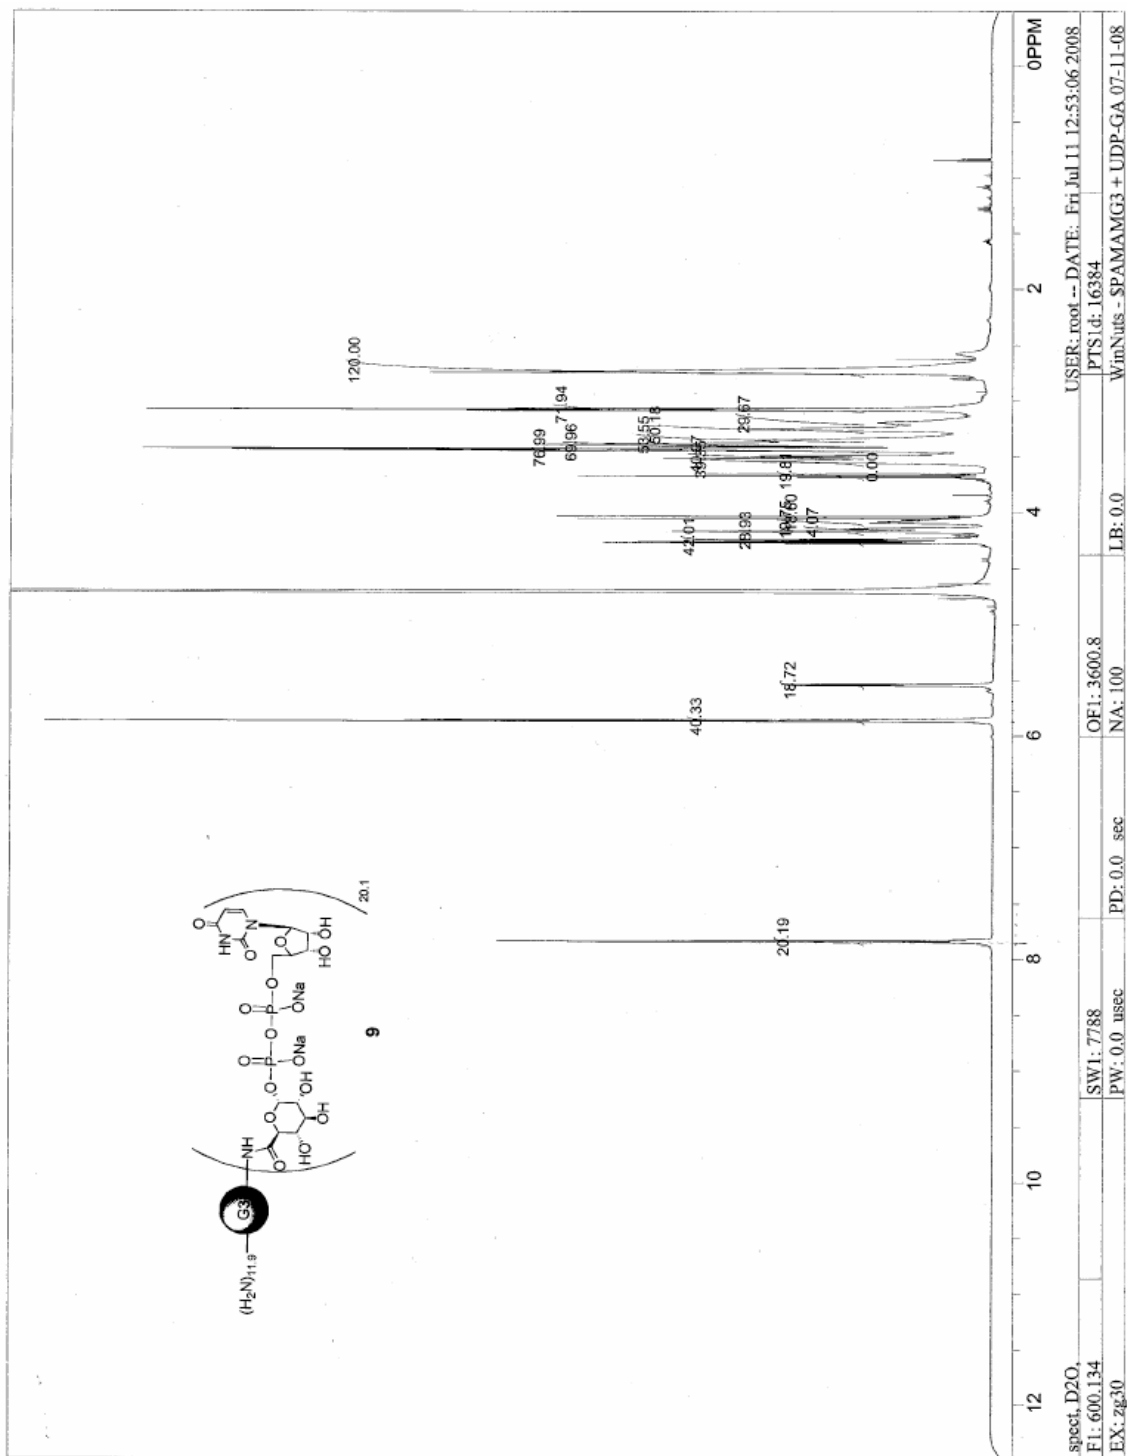

Figure S2.  $^1\text{H}$  NMR spectrum of PAMAM-UDPGA conjugate **12**.

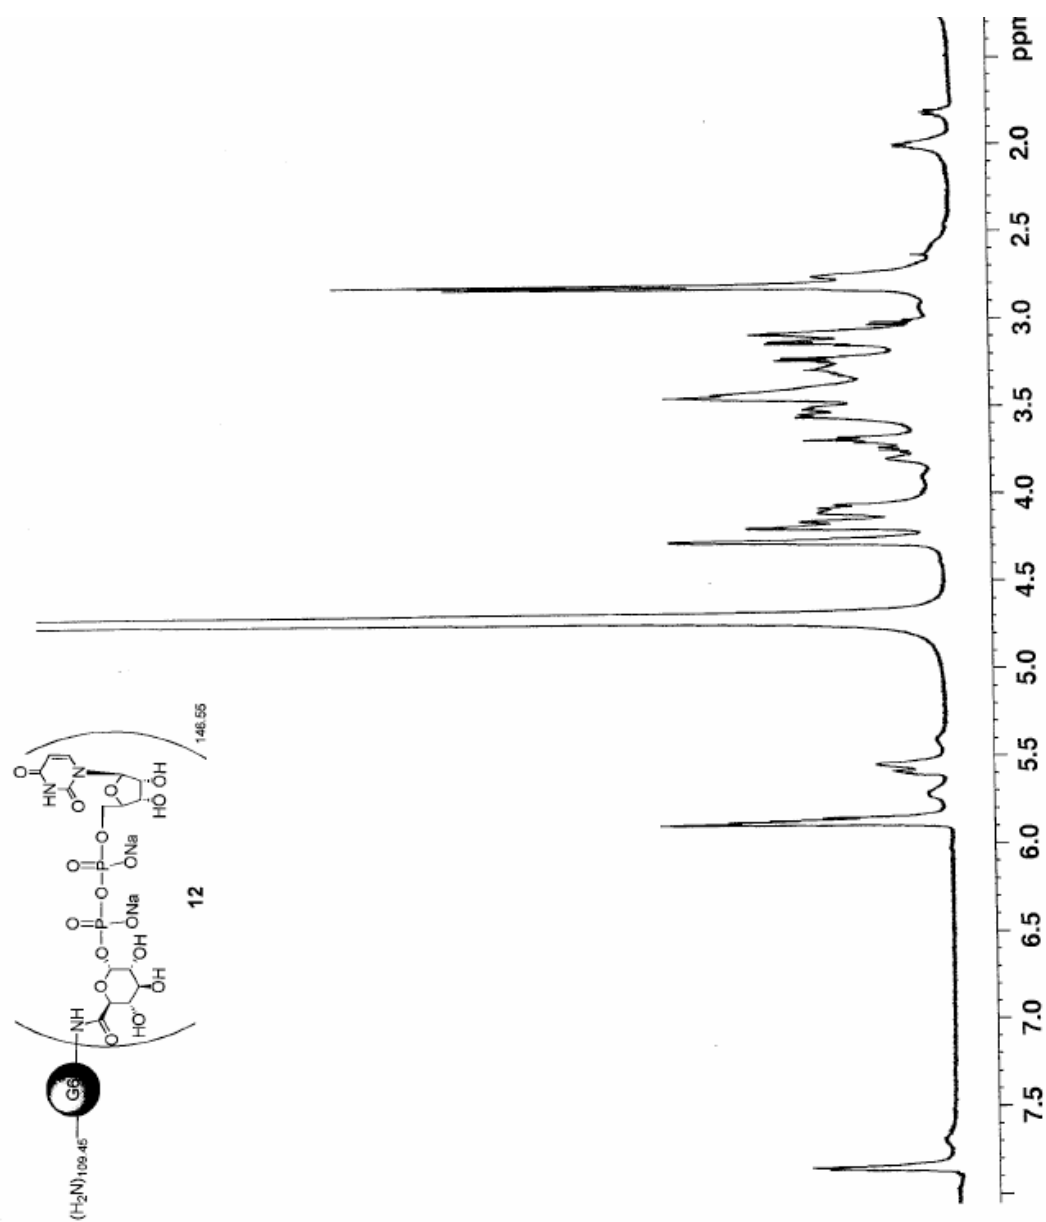

Figure S3. MALDI MS of PAMAM dendrimer complex **8**.

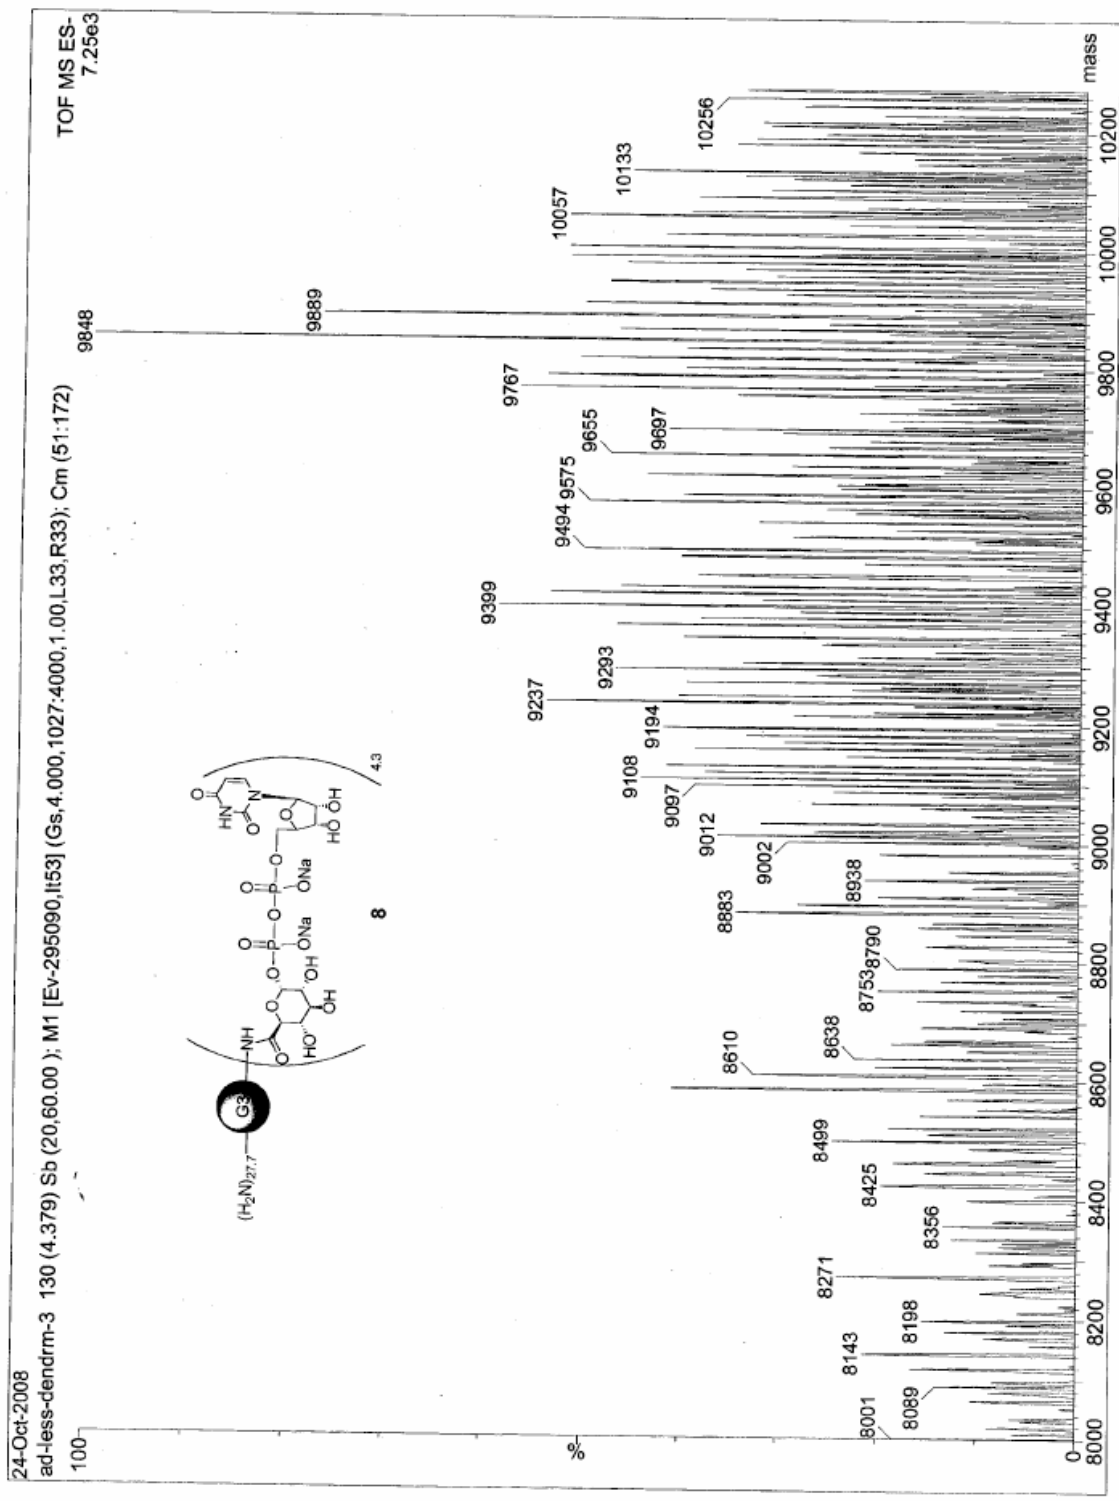

Figure S4. MALDI MS of PAMAM dendrimer complex **9**.

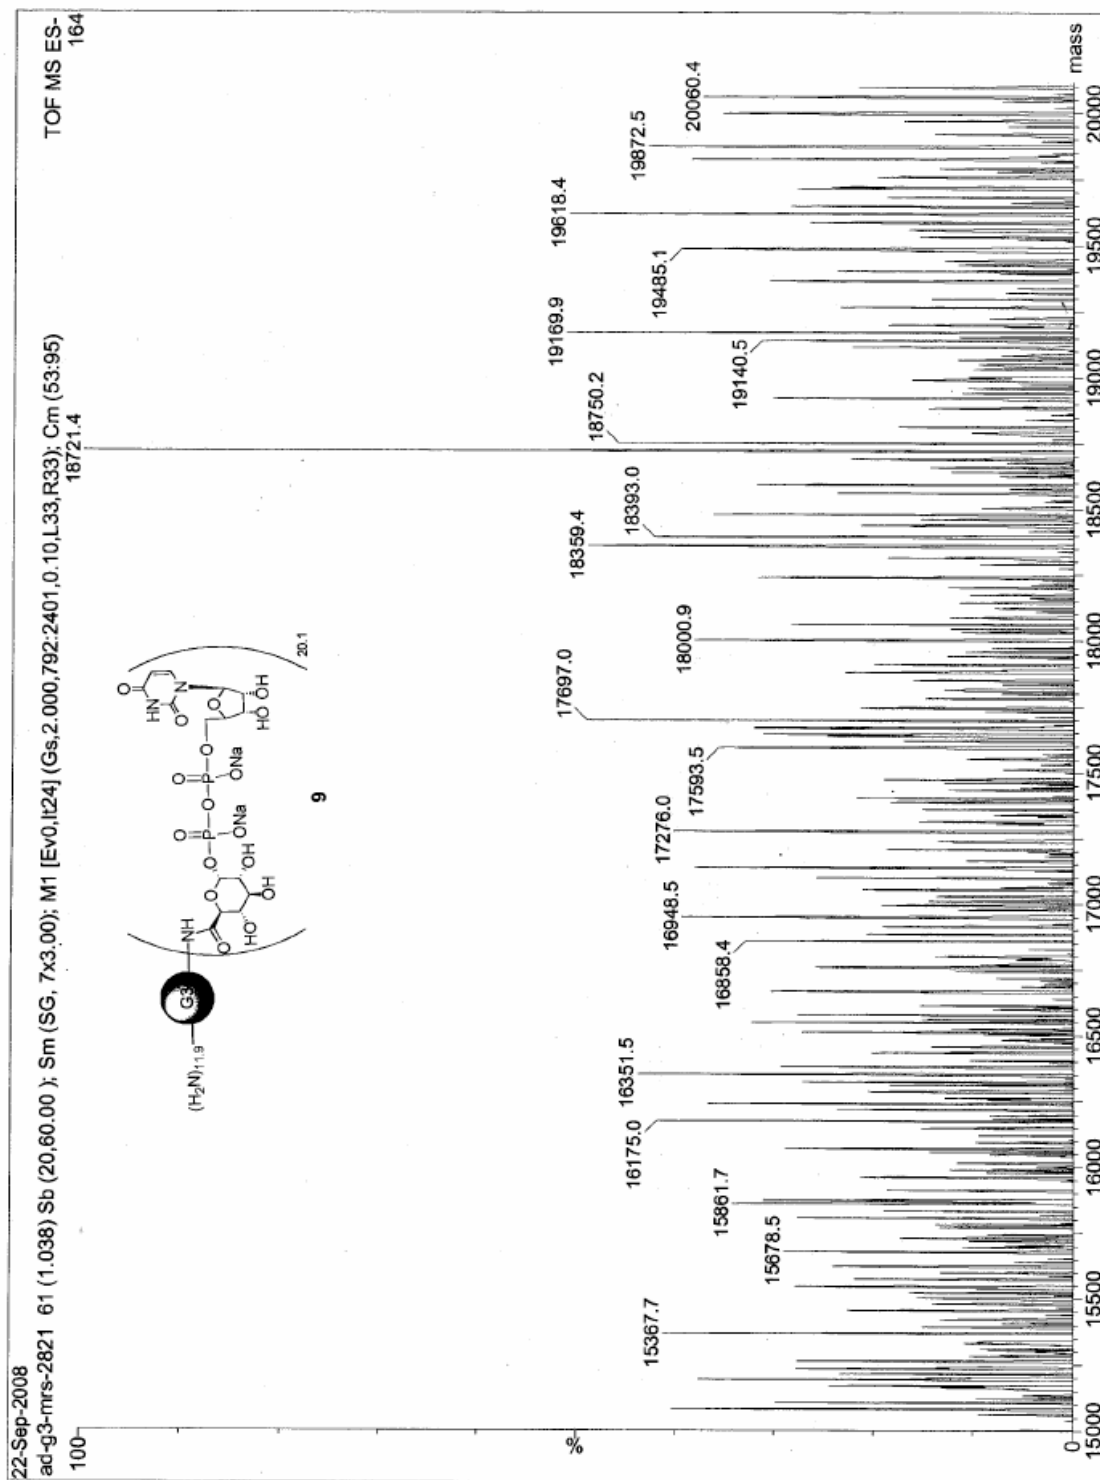

Figure S4. MALDI MS of PAMAM dendrimer complex **10**.

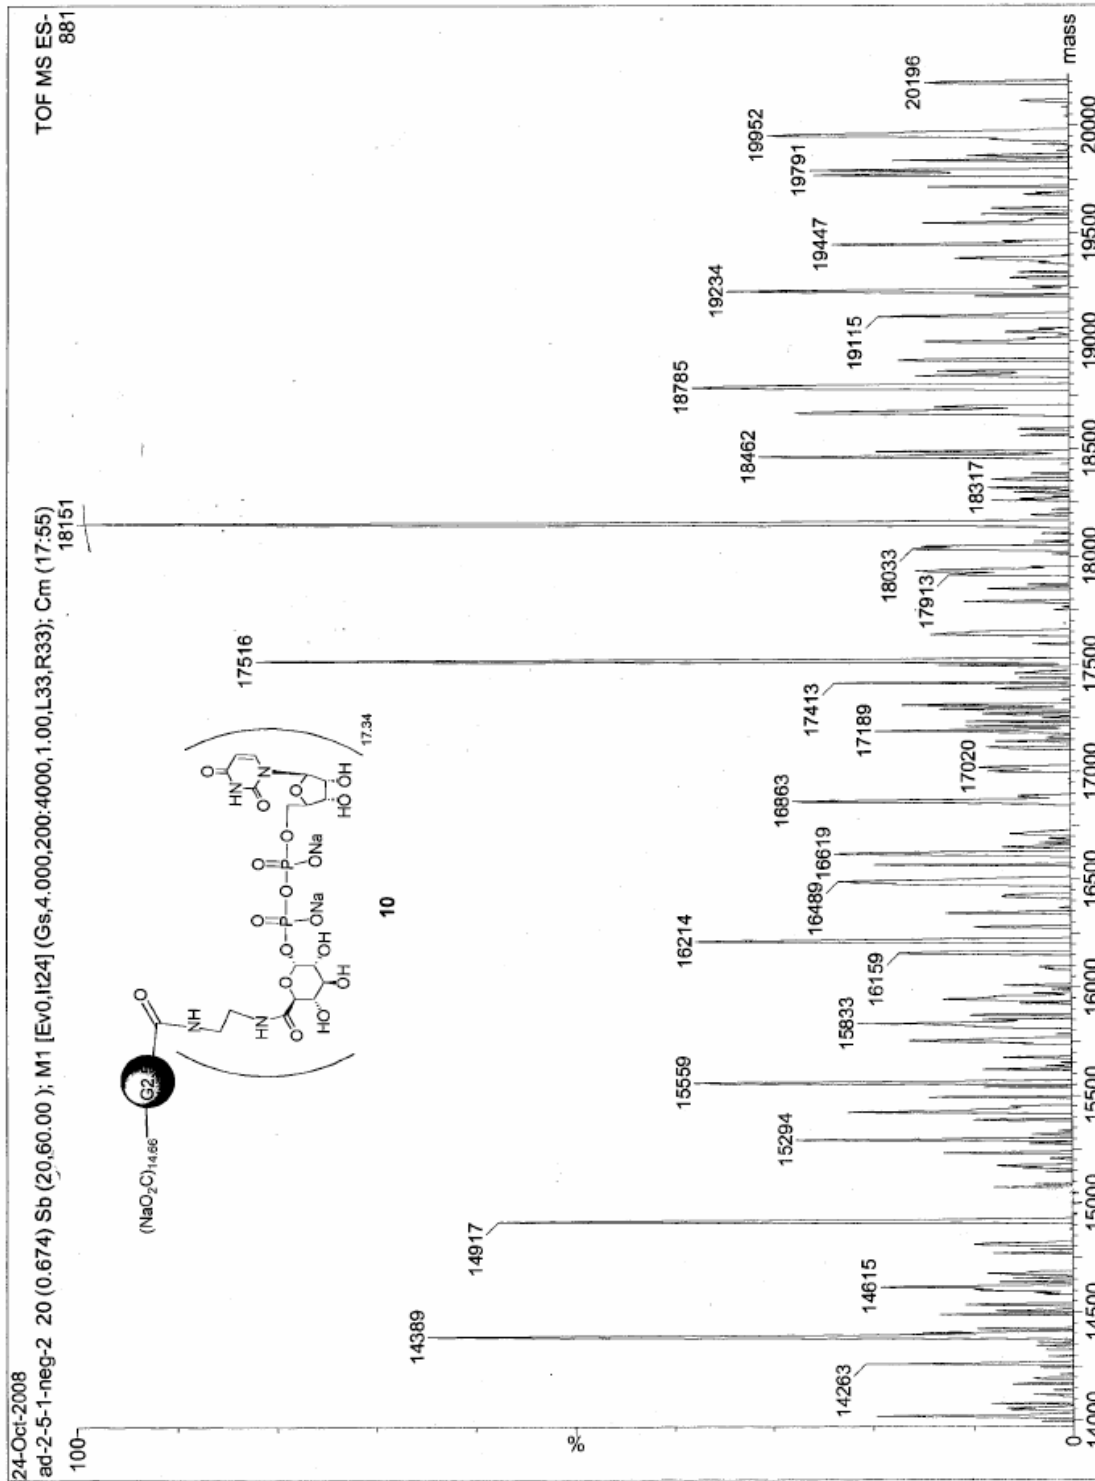

Figure S6. MALDI MS of PAMAM dendrimer complex **11**.

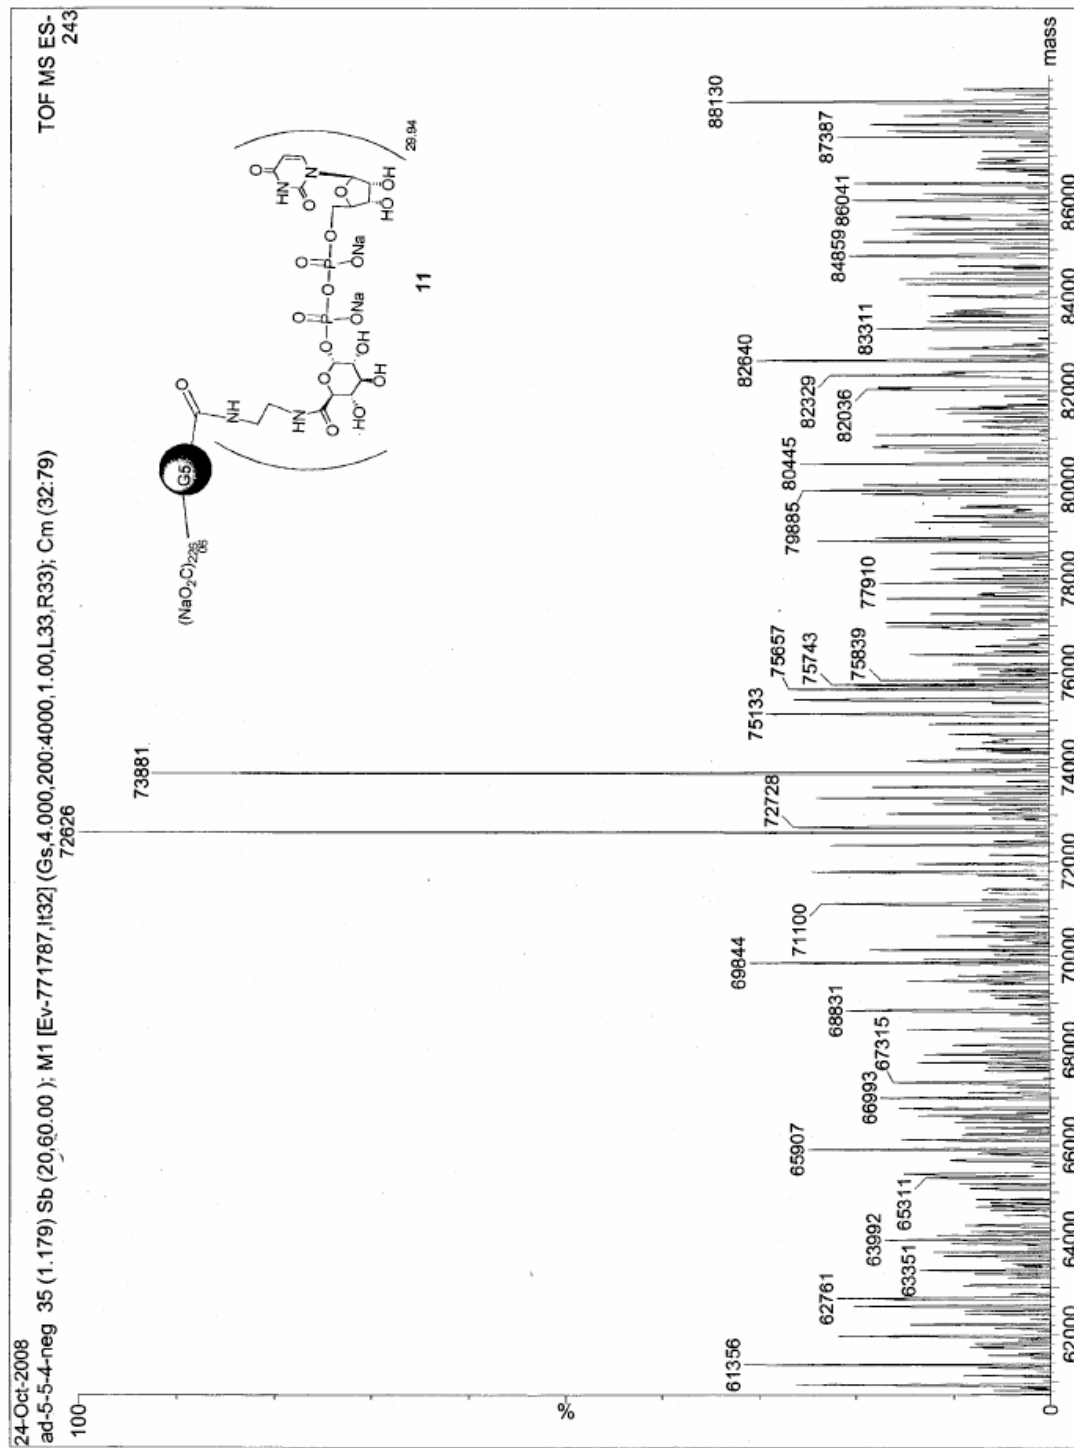

Figure S7. MALDI MS of PAMAM dendrimer complex **15**.

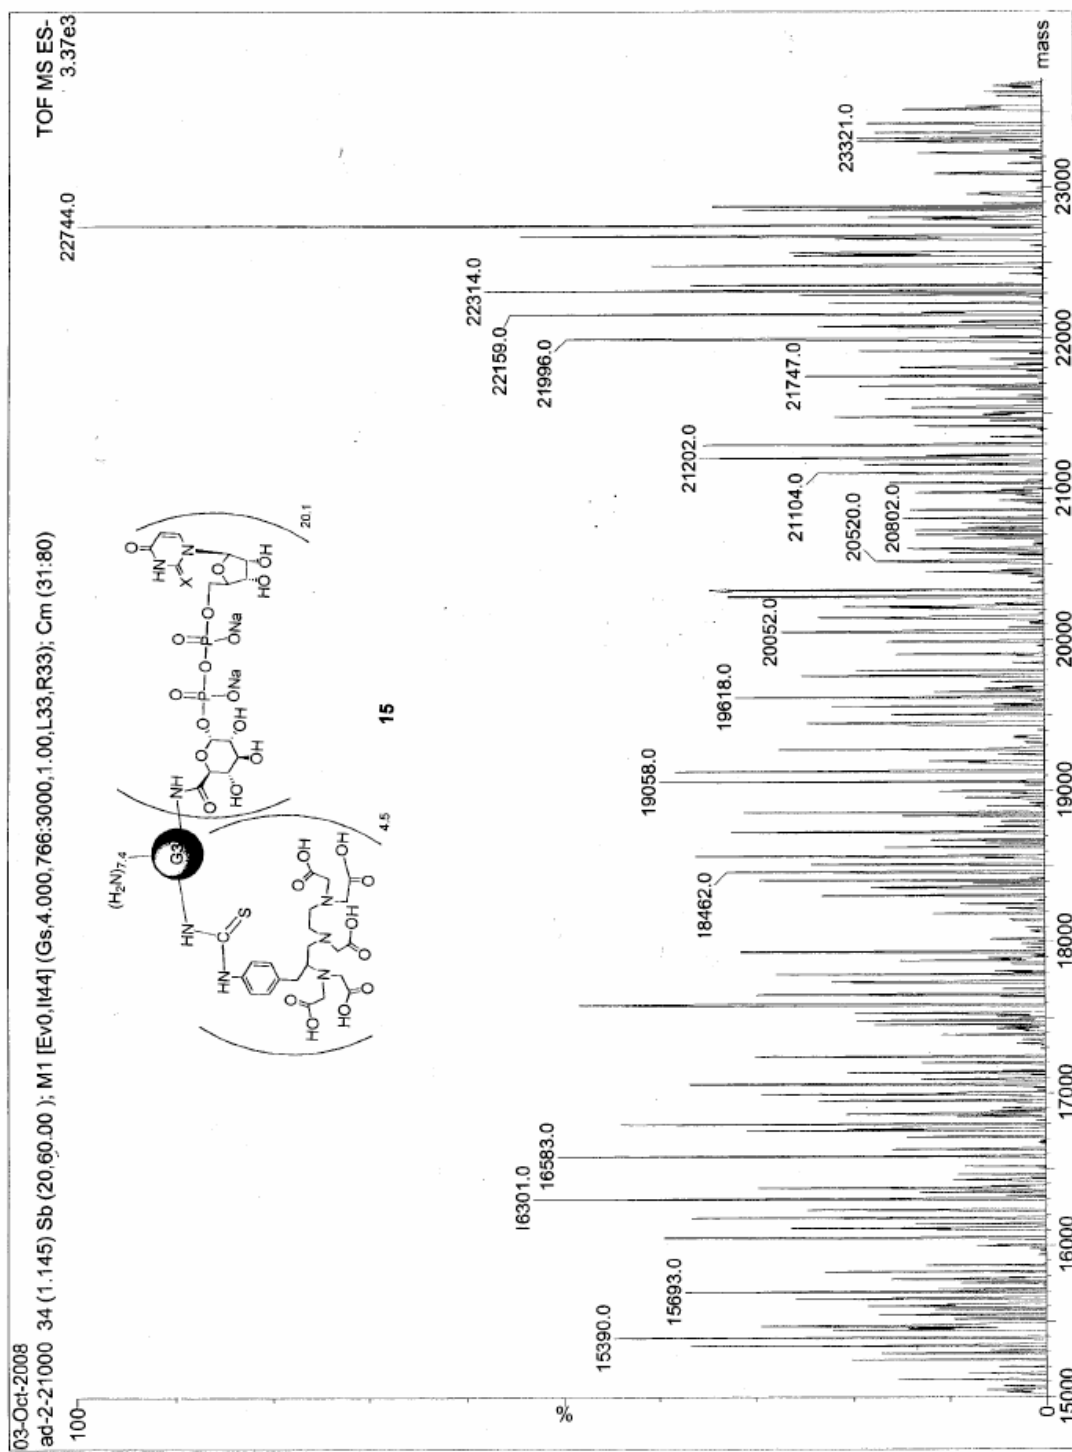

Supplement: NIHMS294981-supplement-Supporting_information.pdf [file NIHMS294981-supplement-Supporting_information.pdf]
